# Supplementary material
Source: publisher site journal article supplement (https://www.spandidos-publications.com/3470/downloadSupplementary)

Figure S1. Body weight of mice in control and erastin groups. n=6 per group. Results were expressed as mean  $\pm$  standard error of the mean.

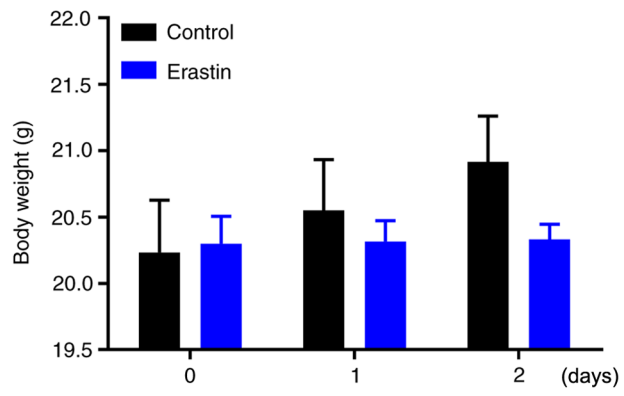

Supplement: Supplementary file 1 [file downloadSupplementary]
